# Supplementary material
Source: Springer Nature journal article supplement (https://www.springermedizin.de/resource/supplementary/12885_2014_4574_MOESM4_ESM.pdf/9466724)

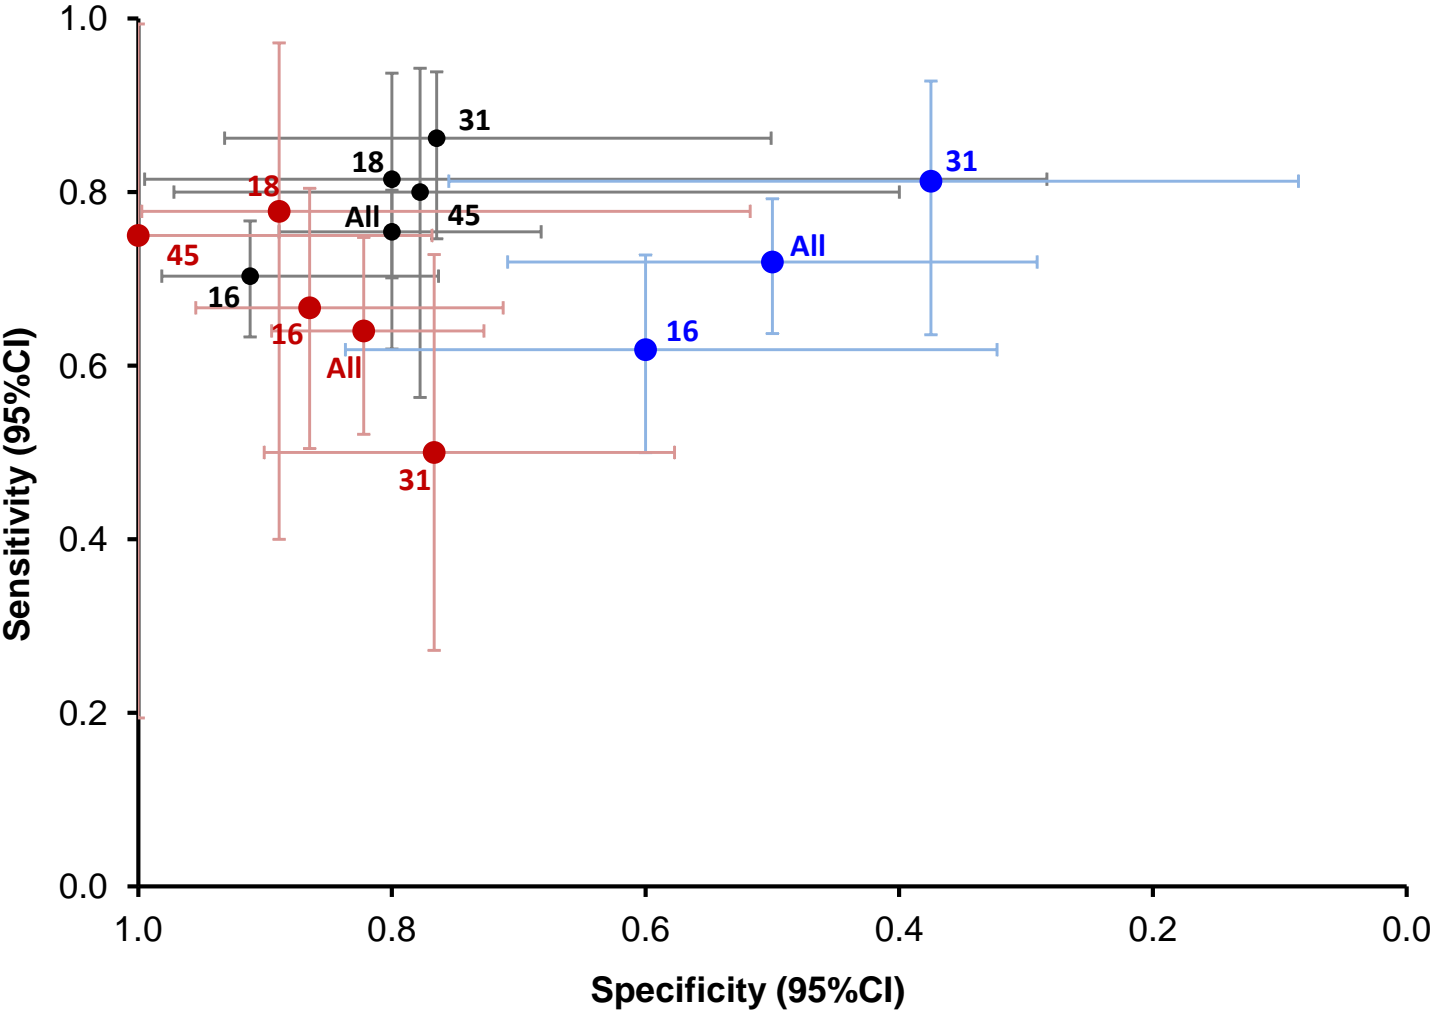

Supplement: MOESM4 [file 9466724]
